# Supplementary material for: Move to Flow: The Benefits and Barriers of a Physical Activity Nature-Based Pilot Programme
Source: MDPI journal article supplement (doi:10.3390/sports12030075), 2024-03-06
Supplement: s1 [file s1]

| Description      |                       | N  | Percentage |
|------------------|-----------------------|----|------------|
| Country          | Latvia                | 49 | 36,8%      |
|                  | Serbia                | 38 | 28,6%      |
|                  | Spain                 | 46 | 34,6%      |
| Gender           | Male                  | 58 | 43,6%      |
|                  | Female                | 74 | 55,6%      |
|                  | Non binary            | 1  | 0,8%       |
| Age              | 18-25                 | 58 | 43,6%      |
|                  | 26-35                 | 30 | 22,6%      |
|                  | 36-50                 | 35 | 26,3%      |
|                  | 51-64                 | 7  | 5,3%       |
|                  | > 64                  | 3  | 2,3%       |
| Academic level   | Basic                 | 12 | 9,0%       |
|                  | High School           | 28 | 21,1%      |
|                  | Postgraduated         | 4  | 3,0%       |
|                  | Secondary             | 26 | 19,5%      |
|                  | University            | 48 | 36,1%      |
|                  | VET                   | 15 | 11,3%      |
| Employment       | Employee              | 80 | 60,2%      |
|                  | Other                 | 8  | 6,0%       |
|                  | Retired               | 1  | 0,8%       |
|                  | Self-employed         | 8  | 6,0%       |
|                  | Student               | 23 | 17,3%      |
|                  | Unemployed            | 13 | 9,8%       |
| Household        | Couple grown children | 10 | 7,5%       |
|                  | Couple minor children | 17 | 12,8%      |
|                  | Couple no children    | 19 | 14,3%      |
|                  | Institutional house   | 3  | 2,3%       |
|                  | No answer             | 1  | 0,8%       |
|                  | One-person            | 23 | 17,3%      |
|                  | Other                 | 45 | 33,8%      |
|                  | Shared house          | 7  | 5,3%       |
|                  | Single parent         | 8  | 6,0%       |
| Financial status | Always                | 7  | 5,3%       |
|                  | Never                 | 50 | 37,6%      |
|                  | No answer             | 1  | 0,8%       |
|                  | Often                 | 26 | 19,5%      |
|                  | Sometimes             | 49 | 36,8%      |
| H/week PA        | 1-2 hours a week      | 8  | 6,0%       |
|                  | 3-4 hours a week      | 42 | 31,6%      |
|                  | 5-6 hours a week      | 38 | 28,6%      |
|                  | 7 or more             | 37 | 27,8%      |
|                  | Do not exercise       | 2  | 1,5%       |
|                  | Less than 1h          | 6  | 4,5%       |
|                  | Do not exercise       | 4  | 3%         |
| Intensity        | Low                   | 18 | 13,5%      |
|                  | Moderate              | 69 | 51,9%      |
|                  | No answer             | 1  | 0,8%       |
|                  | Vigorous              | 41 | 30,8%      |
| Modality         | Adventure/risk sports | 1  | 0,8%       |
|                  | Combat sports         | 3  | 2,3%       |

|                        |                            |    |       |
|------------------------|----------------------------|----|-------|
|                        | Fitness                    | 34 | 25,6% |
|                        | Gym                        | 19 | 14,3% |
|                        | None                       | 2  | 1,5%  |
|                        | Other                      | 28 | 21,1% |
|                        | Raquet sports              | 1  | 0,8%  |
|                        | Running, cycling, swimming | 31 | 23,3% |
|                        | Team sports and games      | 14 | 10,55 |
| <b>Active mobility</b> | Cycling                    | 26 | 19,5% |
|                        | Other                      | 2  | 1,5%  |
|                        | Public transport           | 29 | 21,8% |
|                        | Scooter or similar         | 4  | 3,0%  |
|                        | Walking                    | 34 | 25,6% |

Table S1: Table with the sociodemographic characteristics of the participants in the project.

All videos: <https://zenodo.org/records/10784507>
